# Supplementary material
Source: ML conference proceedings conference paper supplement (https://openreview.net/forum?id=L5HKN-IsdSE)
Supplement: supplementary_material [file attachment]

**Algorithm 1** DrQ-v2: Improved data-augmented RL.**Inputs:**

$f_\xi, \pi_\phi, Q_{\theta_1}, Q_{\theta_2}$ : parametric networks for encoder, policy, and Q-functions respectively.

aug: random shifts image augmentation.

$\sigma(t)$ : scheduled standard deviation for the exploration noise defined in Equation (3).

$T, B, \alpha, \tau, c$ : training steps, mini-batch size, learning rate, target update rate, clip value.

**Training routine:**

**for** each timestep  $t = 1..T$  **do**

$\sigma_t \leftarrow \sigma(t)$

$\mathbf{a}_t \leftarrow \pi_\phi(f_\xi(\mathbf{x}_t)) + \epsilon$  and  $\epsilon \sim \mathcal{N}(0, \sigma_t^2)$

$\mathbf{x}_{t+1} \sim P(\cdot | \mathbf{x}_t, \mathbf{a}_t)$

$\mathcal{D} \leftarrow \mathcal{D} \cup (\mathbf{x}_t, \mathbf{a}_t, R(\mathbf{x}_t, \mathbf{a}_t), \mathbf{x}_{t+1})$

UPDATECRITIC( $\mathcal{D}, \sigma_t$ )

UPDATEACTOR( $\mathcal{D}, \sigma_t$ )

**end for**

**procedure** UPDATECRITIC( $\mathcal{D}, \sigma$ )

$\{(\mathbf{x}_t, \mathbf{a}_t, r_{t:t+n-1}, \mathbf{x}_{t+n})\} \sim \mathcal{D}$

$\mathbf{h}_t, \mathbf{h}_{t+n} \leftarrow f_\xi(\text{aug}(\mathbf{x}_t)), f_\xi(\text{aug}(\mathbf{x}_{t+n}))$

$\mathbf{a}_{t+n} \leftarrow \pi_\phi(\mathbf{h}_{t+n}) + \epsilon$  and  $\epsilon \sim \text{clip}(\mathcal{N}(0, \sigma^2))$

Compute  $\mathcal{L}_{\theta_1, \xi}$  and  $\mathcal{L}_{\theta_2, \xi}$  using Equation (1)

$\xi \leftarrow \xi - \alpha \nabla_\xi (\mathcal{L}_{\theta_1, \xi} + \mathcal{L}_{\theta_2, \xi})$

$\theta_k \leftarrow \theta_k - \alpha \nabla_{\theta_k} \mathcal{L}_{\theta_k, \xi} \quad \forall k \in \{1, 2\}$

$\bar{\theta}_k \leftarrow (1 - \tau)\bar{\theta}_k + \tau\theta_k \quad \forall k \in \{1, 2\}$

**end procedure**

**procedure** UPDATEACTOR( $\mathcal{D}, \sigma$ )

$\{(\mathbf{x}_t)\} \sim \mathcal{D}$

$\mathbf{h}_t \leftarrow f_\xi(\text{aug}(\mathbf{x}_t))$

$\mathbf{a}_t \leftarrow \pi_\phi(\mathbf{h}_t) + \epsilon$  and  $\epsilon \sim \text{clip}(\mathcal{N}(0, \sigma^2))$

Compute  $\mathcal{L}_\phi$  using Equation (2)

$\phi \leftarrow \phi - \alpha \nabla_\phi \mathcal{L}_\phi$

**end procedure**

▷ Compute stddev for the exploration noise

▷ Add noise to the deterministic action

▷ Run transition function for one step

▷ Add a transition to the replay buffer

▷ Sample a mini batch of  $B$  transitions

▷ Apply data augmentation and encode

▷ Sample action

▷ Compute critic losses

▷ Update encoder weights

▷ Update critic weights

▷ Update critic target weights

▷ Sample a mini batch of  $B$  observations

▷ Apply data augmentation and encode

▷ Sample action

▷ Compute actor loss

▷ Update actor's weights only

## B Benchmarks

We classify a set of 24 continuous control tasks from DMC [Tassa et al., 2018] into *easy*, *medium*, and *hard* benchmarks and provide a summary for each task in Table 1.

| Task                    | Traits               | Difficulty | Allowed Steps    | $\dim(\mathcal{S})$ | $\dim(\mathcal{A})$ |
|-------------------------|----------------------|------------|------------------|---------------------|---------------------|
| Cartpole Balance        | balance, dense       | easy       | $1 \times 10^6$  | 4                   | 1                   |
| Cartpole Balance Sparse | balance, sparse      | easy       | $1 \times 10^6$  | 4                   | 1                   |
| Cartpole Swingup        | swing                | dense      | $1 \times 10^6$  | 4                   | 1                   |
| Cup Catch               | swing, catch, sparse | easy       | $1 \times 10^6$  | 8                   | 2                   |
| Finger Spin             | rotate, dense        | easy       | $1 \times 10^6$  | 6                   | 2                   |
| Hopper Stand            | stand, dense         | easy       | $1 \times 10^6$  | 14                  | 4                   |
| Pendulum Swingup        | swing, sparse        | easy       | $1 \times 10^6$  | 2                   | 1                   |
| Walker Stand            | stand, dense         | easy       | $1 \times 10^6$  | 18                  | 6                   |
| Walker Walk             | walk, dense          | easy       | $1 \times 10^6$  | 18                  | 6                   |
| Acrobot Swingup         | diff. balance, dense | medium     | $3 \times 10^6$  | 4                   | 1                   |
| Cartpole Swingup Sparse | swing, sparse        | medium     | $3 \times 10^6$  | 4                   | 1                   |
| Cheetah Run             | run, dense           | medium     | $3 \times 10^6$  | 18                  | 6                   |
| Finger Turn Easy        | turn, sparse         | medium     | $3 \times 10^6$  | 6                   | 2                   |
| Finger Turn Hard        | turn, sparse         | medium     | $3 \times 10^6$  | 6                   | 2                   |
| Hopper Hop              | move, dense          | medium     | $3 \times 10^6$  | 14                  | 4                   |
| Quadruped Run           | run, dense           | medium     | $3 \times 10^6$  | 56                  | 12                  |
| Quadruped Walk          | walk, dense          | medium     | $3 \times 10^6$  | 56                  | 12                  |
| Reach Duplo             | manipulation, sparse | medium     | $3 \times 10^6$  | 55                  | 9                   |
| Reacher Easy            | reach, dense         | medium     | $3 \times 10^6$  | 4                   | 2                   |
| Reacher Hard            | reach, dense         | medium     | $3 \times 10^6$  | 4                   | 2                   |
| Walker Run              | run, dense           | medium     | $3 \times 10^6$  | 18                  | 6                   |
| Humanoid Stand          | stand, dense         | hard       | $30 \times 10^6$ | 54                  | 21                  |
| Humanoid Walk           | walk, dense          | hard       | $30 \times 10^6$ | 54                  | 21                  |
| Humanoid Run            | run, dense           | hard       | $30 \times 10^6$ | 54                  | 21                  |

Table 1: A detailed description of each tasks in our *easy*, *medium*, and *hard* benchmarks.

## C Hyper-parameters

The full list of hyper-parameters is presented in Table 2. While we tried to keep the settings identical for each of the task, there are a few specific deviations for some tasks.

**Walker Stand/Walk/Run** For all three tasks we use mini-batch size of 512 and  $n$ -step return of 1.  
**Cartpole Swingup Sparse** stddev. schedule is set to 1.0 to facilitate stronger exploration in the sparse reward setting.

**Quadruped Run** We set the replay buffer size to  $10^5$ .

**Humanoid Stand/Walk/Run** We set learning rate to  $8 \times 10^{-5}$  and increase features dim. to 100.

Table 2: A default set of hyper-parameters used in our experiments.

| Parameter                                 | Setting                          |
|-------------------------------------------|----------------------------------|
| Replay buffer capacity                    | $10^6$                           |
| Action repeat                             | 2                                |
| Seed frames                               | 4000                             |
| Exploration steps                         | 2000                             |
| $n$ -step returns                         | 3                                |
| Mini-batch size                           | 256                              |
| Discount $\gamma$                         | 0.99                             |
| Optimizer                                 | Adam                             |
| Learning rate                             | $10^{-4}$                        |
| Agent update frequency                    | 2                                |
| Critic Q-function soft-update rate $\tau$ | 0.01                             |
| Features dim.                             | 50                               |
| Hidden dim.                               | 1024                             |
| Exploration stddev. clip                  | 0.3                              |
|                                           | easy: linear(1.0, 0.1, 100000)   |
| Exploration stddev. schedule              | medium: linear(1.0, 0.1, 500000) |
|                                           | hard: linear(1.0, 0.1, 2000000)  |

## 407 D Comparison to Model-Free Methods

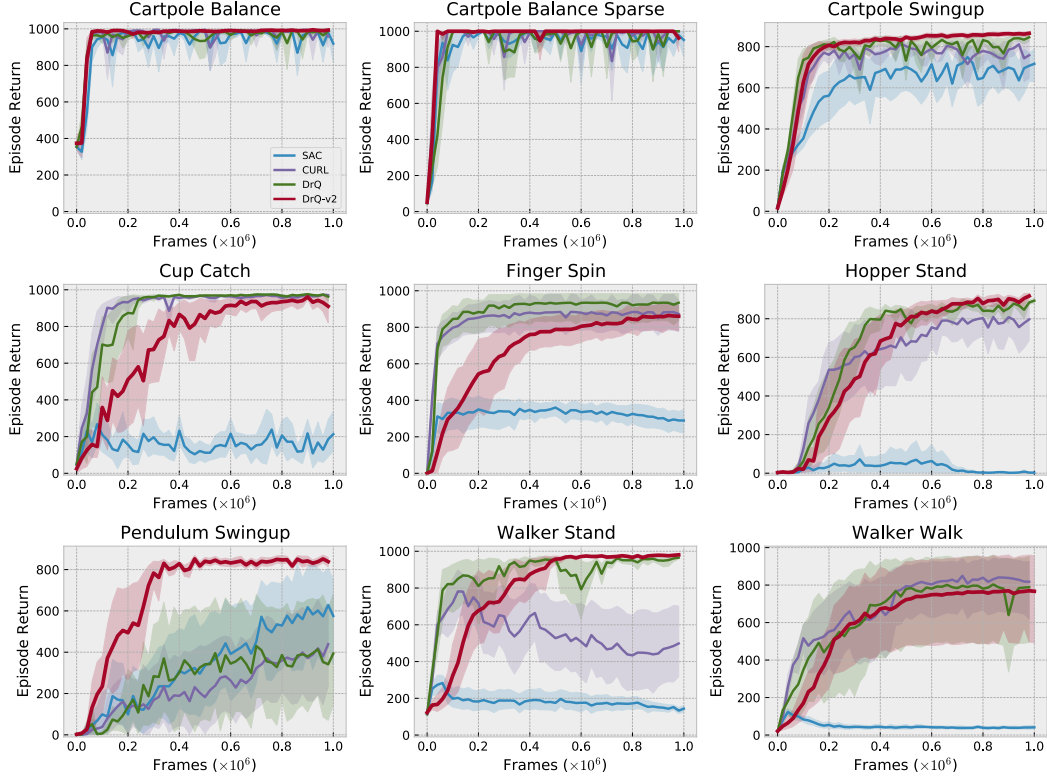

Figure 7: The *easy* benchmark consists of 9 tasks, where performance gains have been largely saturated by prior work. Still, DrQ-v2 is able to match sample complexity of the baselines. We note, that evaluation on these tasks is done for completeness reasons only, and encourage RL practitioners to refrain from using them for benchmarking purposes in future research.

## E Comparison to Model-Based Methods

**Baseline** To see how DrQ-v2 stacks up against model-based methods, which tend to achieve better sample complexity in expense of a larger computational footprint, we also compare to recent and unpublished<sup>2</sup> improvements to Dreamer-v2 [Hafner et al., 2020], a leading model-based approach for visual continuous control. The recent update shows that the model-based approach can solve the DMC humanoid tasks directly from pixel inputs. The open-source implementation of Dreamer-v2 (<https://github.com/danijar/dreamerv2>) only provides learning curves for *Humanoid Walk*. For this reason we run their code to obtain results on other DMC tasks. To limit hardware requirements of compute-expensive Dreamer-v2, we only run it on a subset of 12 out of 24 considered tasks. This subset, however, overlaps with all the three (i.e. easy, medium, and hard) benchmarks.

**Sample Efficiency Axis** Our empirical study in Figure 8 reveals that in many cases, DrQ-v2, despite being a model-free method, can rival sample efficiency of state-of-the-art model-based Dreamer-v2. We note, however, that on several tasks (for example *Acrobot Swingup* and *Finger Turn Hard*) Dreamer-v2 outperforms DrQ-v2. We leave investigation of such discrepancy for future work.

**Compute Efficiency Axis** A different picture emerges if comparison is done with respect to wall-clock training time. Dreamer-v2, being a model-based method, performs significantly more floating point operations to reach its sample efficiency. In our benchmarks, Dreamer-v2 records a throughput of 24 FPS, which is  $4\times$  less than DrQ-v2’s throughput of 96 FPS, measured on the same hardware. In Figure 9 we plot learning curves against wall-clock time and observe that DrQ-v2 takes less time to solve the tasks.

---

<sup>2</sup>ArXiv v3 revision from May 3, 2021 introduces a new result on the *Humanoid Walk* task in Appendix A.

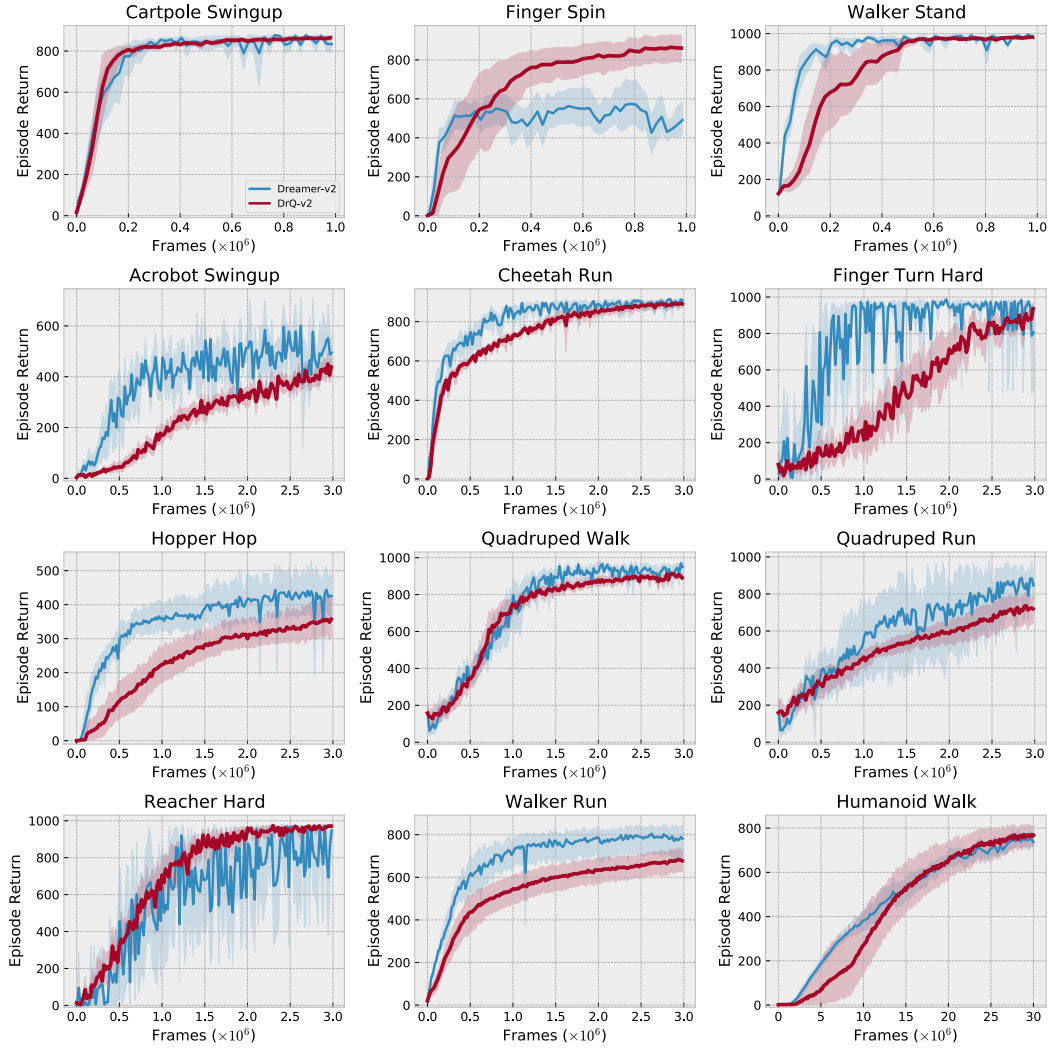

Figure 8: In many cases model-free DrQ-v2 can rival model-based Dreamer-v2 in sample efficiency. There are several tasks, however, where Dreamer-v2 performs better.

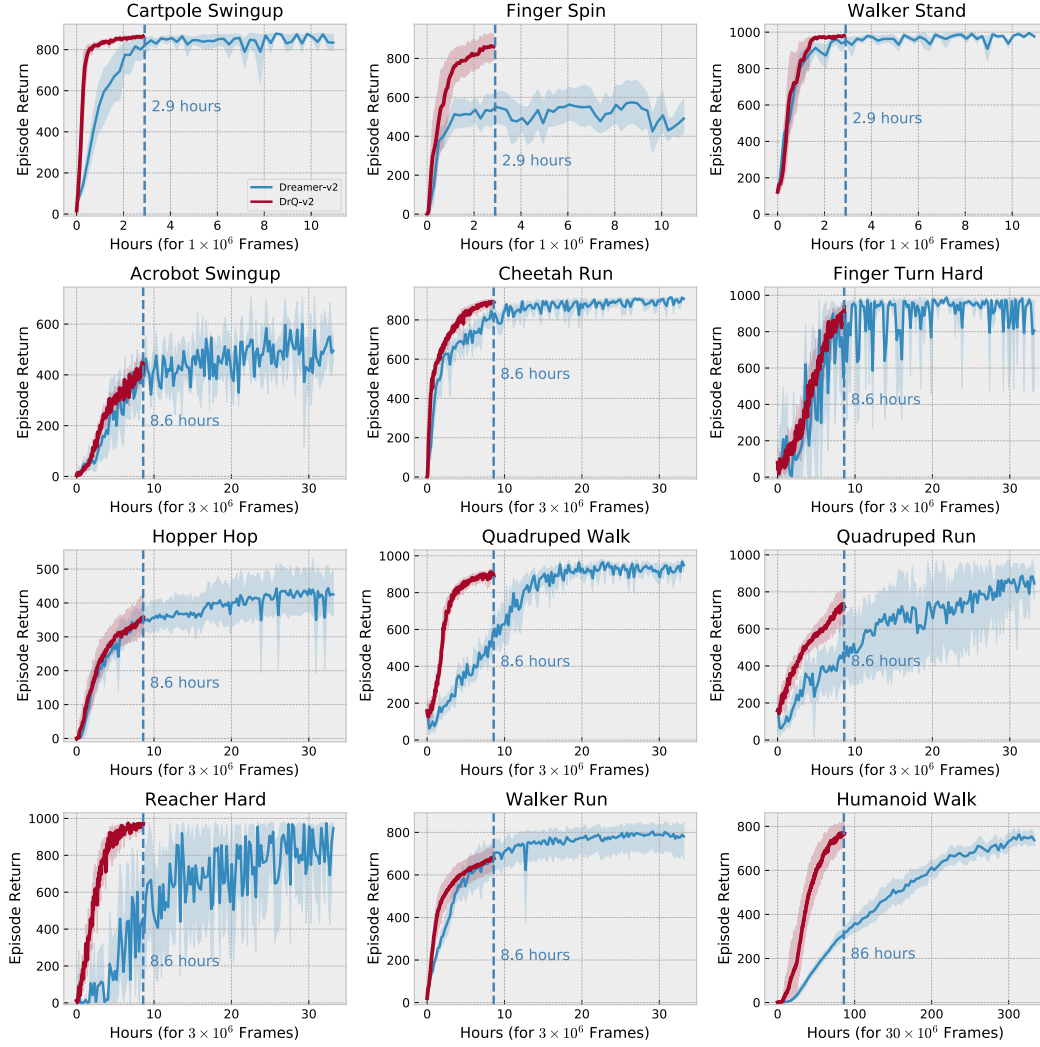

Figure 9: Model-based Dreamer-v2 performs more computations than model-free DrQ-v2. This allows DrQ-v2 to train faster in terms of wall-clock time and outperform Dreamer-v2 in this aspect.
